# Supplementary material for: Surface modulation for highly efficient and stable perovskite solar cells
Source: Royal Society of Chemistry journal article supplement (doi:10.1039/d3ra00809f), 2023-01-01
Supplement: d3ra00809f1.pdf [file d3ra00809f1.pdf]

## Supporting Information

### Surface modulation for highly efficient and stable perovskite solar cells

Dongliang Bai<sup>‡,a</sup>, Dexu Zheng<sup>‡,c</sup>, Shaoan Yang<sup>‡,b</sup>, Fengyang Yu,<sup>\*b</sup> Xuejie Zhu,<sup>a</sup> Lei Peng,<sup>c</sup> Likun Wang,<sup>b</sup> Jishuang Liu,<sup>c</sup> Dong Yang,<sup>\*b</sup> Shengzhong (Frank) Liu<sup>\*a,b</sup>

<sup>a</sup>Key Laboratory of Applied Surface and Colloid Chemistry, Ministry of Education, Shaanxi Key Laboratory for Advanced Energy Devices, Shaanxi Engineering Lab for Advanced Energy Technology, School of Materials Science and Engineering, Shaanxi Normal University, Xi'an, 710119, China

<sup>b</sup>Dalian National Laboratory for Clean Energy, Dalian Institute of Chemical Physics, Chinese Academy of Sciences, Dalian, 116023, China

<sup>c</sup>China National Nuclear Power Co., Ltd., Beijing 100097, China

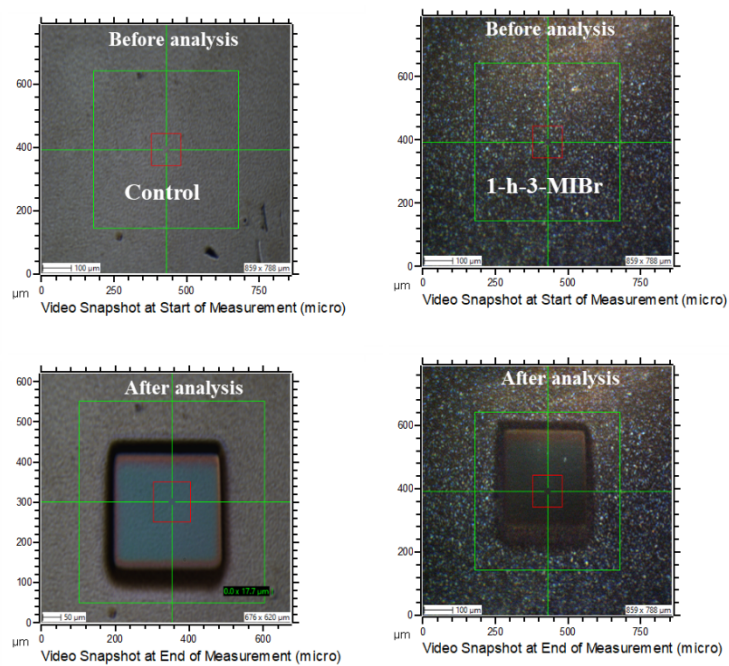

**Figure S1.** The photos of samples before and after sputter etching. The red square is the detected region.

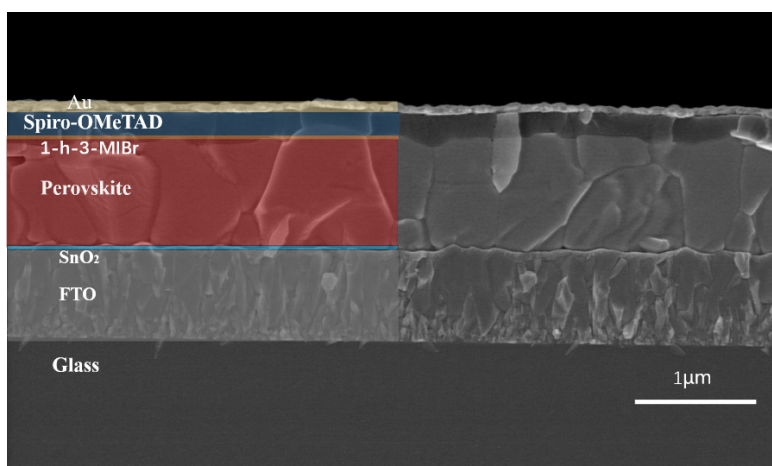

**Figure S2.** Cross-sectional SEM image of the completed device with 1-h-3-MIBr.

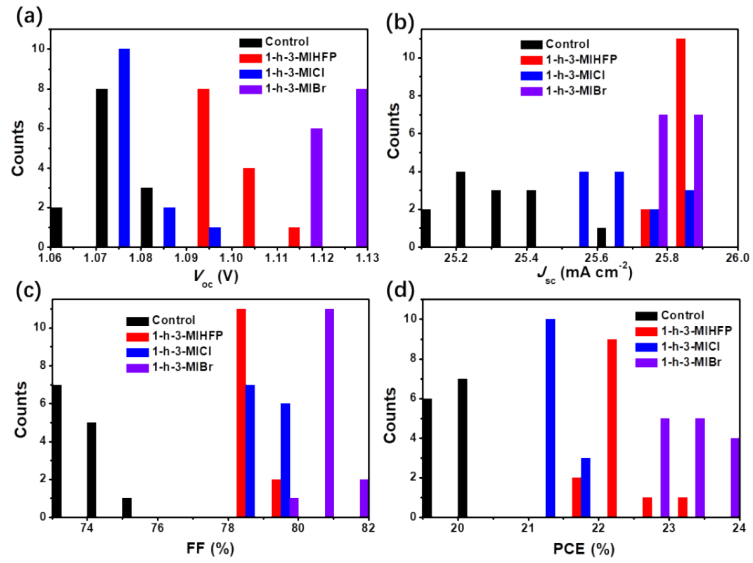

**Figure S3.** Statistical photovoltaic parameters of devices, including histograms of the (a)  $V_{oc}$ , (b)  $J_{sc}$ , (c) FF, and (d) PCE. Note that the data were collected from 13 devices. The devices were measured outside the glove box under simulated AM 1.5G solar irradiation at  $100 \text{ mW cm}^{-2}$  with an aperture area of  $0.1 \text{ cm}^2$ .

**Table S1.** PCE of two-step PSCs

| Ref.      | Perovskite                                                                   | PCE (%) | year               |
|-----------|------------------------------------------------------------------------------|---------|--------------------|
| 1         | FAPbI <sub>3</sub>                                                           | 21.2    | 2022 <sup>1</sup>  |
| 2         | FAPbI <sub>3</sub>                                                           | 23.65   | 2022 <sup>2</sup>  |
| 3         | FAPbI <sub>3</sub>                                                           | 19.04   | 2022 <sup>3</sup>  |
| 4         | (FAPbI <sub>3</sub> ) <sub>1-x</sub> (MAPbBr <sub>3</sub> ) <sub>x</sub>     | 18.09   | 2022 <sup>4</sup>  |
| 5         | (FAPbI <sub>3</sub> ) <sub>0.97</sub> (MAPbBr <sub>3</sub> ) <sub>0.03</sub> | 24.27   | 2022 <sup>5</sup>  |
| 6         | FAPbI <sub>3</sub>                                                           | 22.64   | 2022 <sup>6</sup>  |
| 7         | (FAPbI <sub>3</sub> ) <sub>1-x</sub> (MAPbBr <sub>3</sub> ) <sub>x</sub>     | 22.5    | 2021 <sup>7</sup>  |
| 8         | FAPbI <sub>3</sub>                                                           | 25.6    | 2022 <sup>8</sup>  |
| 9         | FAPbI <sub>3</sub>                                                           | 21.51   | 2021 <sup>9</sup>  |
| 10        | MA <sub>0.07</sub> FA <sub>0.93</sub> PbI <sub>3</sub>                       | 22.5    | 2021 <sup>10</sup> |
| 11        | FAPbI <sub>3</sub>                                                           | 18.41   | 2020 <sup>11</sup> |
| 12        | FA <sub>0.95</sub> CS <sub>0.05</sub> PbI <sub>3</sub>                       | 23.46   | 2022 <sup>12</sup> |
| 13        | (FAPbI <sub>3</sub> ) <sub>0.90</sub> (MAPbBr <sub>3</sub> ) <sub>0.10</sub> | 22.81   | 2023 <sup>13</sup> |
| 14        | (MAFA)Pb(IBr) <sub>3</sub>                                                   | 20.4    | 2022 <sup>14</sup> |
| 15        | (FAPbI <sub>3</sub> ) <sub>0.9</sub> (MAPbBr <sub>3</sub> ) <sub>0.1</sub>   | 21.02   | 2022 <sup>15</sup> |
| 16        | FAPbI <sub>3</sub>                                                           | 21.89   | 2023 <sup>16</sup> |
| 17        | FAPbI <sub>3</sub>                                                           | 20.42   | 2022 <sup>17</sup> |
| 18        | FA <sub>0.9</sub> MA <sub>0.1</sub> PbI <sub>3</sub>                         | 22.26   | 2022 <sup>18</sup> |
| 19        | (FAPbI <sub>3</sub> ) <sub>0.97</sub> (MAPbBr <sub>3</sub> ) <sub>0.03</sub> | 23.11   | 2022 <sup>19</sup> |
| 20        | FA <sub>0.9</sub> MA <sub>0.1</sub> I <sub>2.7</sub> Br <sub>0.3</sub>       | 22.07   | 2022 <sup>20</sup> |
| This work | FA <sub>0.95</sub> MA <sub>0.05</sub> I <sub>3</sub>                         | 23.32   | 2023               |

**Table S2.** The key parameters of PSCs without passivation layers.

| Number | $V_{oc}$ (V) | $J_{sc}$ (mA cm <sup>-2</sup> ) | FF (%) | PCE (%) |
|--------|--------------|---------------------------------|--------|---------|
| 1      | 1.08         | 25.68                           | 75.87  | 21.08   |
| 2      | 1.08         | 25.49                           | 74.91  | 20.65   |
| 3      | 1.08         | 25.43                           | 74.81  | 20.55   |
| 4      | 1.08         | 25.41                           | 74.80  | 20.49   |
| 5      | 1.08         | 25.37                           | 74.67  | 20.38   |
| 6      | 1.07         | 25.37                           | 74.57  | 20.33   |
| 7      | 1.07         | 25.36                           | 73.90  | 20.13   |
| 8      | 1.07         | 25.27                           | 73.89  | 20.05   |
| 9      | 1.07         | 25.26                           | 73.88  | 20.03   |
| 10     | 1.07         | 25.25                           | 73.85  | 20.00   |
| 11     | 1.07         | 25.24                           | 73.85  | 19.99   |
| 12     | 1.07         | 25.19                           | 73.57  | 19.82   |

|         |                 |                  |                  |                  |
|---------|-----------------|------------------|------------------|------------------|
| 13      | 1.07            | 25.17            | 73.31            | 19.72            |
| Average | $1.08 \pm 0.01$ | $25.35 \pm 0.14$ | $74.30 \pm 0.70$ | $20.25 \pm 0.28$ |

**Table S3.** The key parameters of PSCs with 1-h-3-MIHFP.

| Number  | $V_{oc}$ (V)    | $J_{sc}$ (mA cm <sup>-2</sup> ) | FF (%)           | PCE (%)          |
|---------|-----------------|---------------------------------|------------------|------------------|
| 1       | 1.11            | 25.89                           | 79.34            | 22.81            |
| 2       | 1.11            | 25.88                           | 79.03            | 22.70            |
| 3       | 1.11            | 25.88                           | 78.97            | 22.66            |
| 4       | 1.11            | 25.87                           | 78.86            | 22.61            |
| 5       | 1.10            | 25.87                           | 78.81            | 22.47            |
| 6       | 1.10            | 25.85                           | 78.71            | 22.38            |
| 7       | 1.10            | 25.84                           | 78.66            | 22.33            |
| 8       | 1.10            | 25.83                           | 78.66            | 22.33            |
| 9       | 1.10            | 25.83                           | 78.56            | 22.29            |
| 10      | 1.10            | 25.81                           | 78.52            | 22.26            |
| 11      | 1.10            | 25.80                           | 78.49            | 22.24            |
| 12      | 1.10            | 25.79                           | 78.45            | 22.22            |
| 13      | 1.10            | 25.79                           | 78.42            | 22.21            |
| Average | $1.10 \pm 0.01$ | $25.84 \pm 0.04$                | $78.73 \pm 0.27$ | $22.42 \pm 0.21$ |

**Table S4.** The key parameters of PSCs with 1-h-3-MICl.

| Number  | $V_{oc}$ (V)    | $J_{sc}$ (mA cm <sup>-2</sup> ) | FF (%)           | PCE (%)          |
|---------|-----------------|---------------------------------|------------------|------------------|
| 1       | 1.09            | 25.79                           | 79.95            | 22.50            |
| 2       | 1.08            | 25.79                           | 79.55            | 22.20            |
| 3       | 1.08            | 25.66                           | 79.16            | 21.96            |
| 4       | 1.08            | 25.66                           | 79.11            | 21.92            |
| 5       | 1.08            | 25.63                           | 79.07            | 21.88            |
| 6       | 1.08            | 25.61                           | 79.05            | 21.86            |
| 7       | 1.08            | 25.58                           | 78.97            | 21.80            |
| 8       | 1.08            | 25.56                           | 78.74            | 21.72            |
| 9       | 1.08            | 25.55                           | 78.63            | 21.67            |
| 10      | 1.08            | 25.54                           | 78.46            | 21.61            |
| 11      | 1.08            | 25.52                           | 78.35            | 21.57            |
| 12      | 1.08            | 25.52                           | 78.22            | 21.52            |
| 13      | 1.08            | 25.51                           | 78.07            | 21.44            |
| Average | $1.08 \pm 0.01$ | $25.61 \pm 0.10$                | $78.87 \pm 0.54$ | $21.82 \pm 0.29$ |

**Table S5.** The key parameters of PSCs with 1-h-3-MIBr.

| Number  | $V_{oc}$ (V) | $J_{sc}$ (mA cm <sup>-2</sup> ) | FF (%)       | PCE (%)      |
|---------|--------------|---------------------------------|--------------|--------------|
| 1       | 1.12         | 25.84                           | 80.95        | 23.32        |
| 2       | 1.10         | 25.83                           | 80.48        | 22.94        |
| 3       | 1.10         | 25.81                           | 79.76        | 22.72        |
| 4       | 1.10         | 25.79                           | 79.75        | 22.63        |
| 5       | 1.10         | 25.75                           | 79.02        | 22.38        |
| 6       | 1.10         | 25.70                           | 78.99        | 22.32        |
| 7       | 1.10         | 25.54                           | 78.74        | 22.09        |
| 8       | 1.09         | 25.53                           | 78.35        | 21.88        |
| 9       | 1.09         | 25.46                           | 78.08        | 21.73        |
| 10      | 1.09         | 25.45                           | 77.94        | 21.62        |
| 11      | 1.09         | 25.44                           | 77.89        | 21.58        |
| 12      | 1.08         | 25.41                           | 77.48        | 21.33        |
| 13      | 1.07         | 25.40                           | 76.94        | 20.99        |
| Average | 1.10 ± 0.01  | 25.61 ± 0.18                    | 78.80 ± 1.18 | 22.12 ± 0.68 |

## References

1. T. Xu, H. Cai, X. Ye, Y. Zhu, J. Ni, J. Li and J. Zhang, *The Journal of Chemical Physics*, 2022, **157**, 194704.
2. X. Jiao, W.-M. Gu, Y. Xu, K.-J. Jiang, G. Yu, Q.-W. Zhang, C.-Y. Gao, C.-M. Liu, X.-H. Fan, L.-M. Yang and Y. Song, *Chemical Engineering Journal*, 2023, **452**, 139326.
3. Z. Gan, L. Zhao, X. Sun, K. Xu, H. Li and J. Wei, *Journal*, 2022, **12**.
4. J. Ren, G. Zhai, Q. Chen, Z. Wu, B. Wang, Y. Huo, C. Yu and B. Xu, *Materials Science in Semiconductor Processing*, 2022, **150**, 106952.
5. Q. Liu, Z. Ma, Y. Li, G. Yan, D. Huang, S. Hou, W. Zhou, X. Wang, J. Ren, Y. Xiang, R. Ding, X. Yue, Z. Du, M. Zhang, W. Zhang, L. Duan, Y. Huang and Y. Mai, *Chemical Engineering Journal*, 2022, **448**, 137676.
6. Y. Yao, M. Wang, Q. Cai and D. Wei, *Nanoscale*, 2022, **14**, 7203-7210.
7. L. Yang, X. Ma, X. Shang, D. Gao, C. Wang, M. Li, C. Chen, B. Zhang, S. Xu, S. Zheng and H. Song, *Solar RRL*, 2021, **5**, 2100352.
8. Y. Zhao, F. Ma, Z. Qu, S. Yu, T. Shen, H.-X. Deng, X. Chu, X. Peng, Y. Yuan, X. Zhang and J. You, *Science*, 2022, **377**, 531-534.
9. D. Liu, S. Wang, R. Xia, Y. Xu, L. Gu, R. Li, X. Fang, H. Hu, N. Yuan and J. Ding, *ACS Applied Materials & Interfaces*, 2021, **13**, 11783-11792.
10. E. Gutierrez-Partida, H. Hempel, S. Caicedo-Dávila, M. Raoufi, F. Peña-Camargo, M. Grischek, R. Gunder, J. Diekmann, P. Caprioglio, K. O. Brinkmann, H. Köbler, S. Albrecht, T. Riedl, A. Abate, D. Abou-Ras, T. Unold, D. Neher and M. Stolterfoht, *ACS Energy Letters*, 2021, **6**, 1045-1054.
11. W. He, J. Hu, C. Chen, Y. Chen, L. Zeng, X. Zhang, B. Cai, Y. Mai and F. Guo, *ACS Applied Materials & Interfaces*, 2020, **12**, 55830-55837.
12. J. Wang, L. Yuan, H. Luo, C. Duan, B. Zhou, Q. Wen and K. Yan, *Chemical Engineering*

- Journal*, 2022, **446**, 136968.
13. Y. Li, X. Sun, Y. Li, F. Deng, S. Li and X. Tao, *Solar RRL*, 2023, **n/a**.
  14. D. Li, T. Xia, W. Liu, G. Zheng, N. Tian, D. Yao, Y. Yang, H. Wang and F. Long, *Applied Surface Science*, 2022, **592**, 153206.
  15. B. Chen, P. Wang, R. Li, N. Ren, W. Han, Z. Zhu, J. Wang, S. Wang, B. Shi, J. Liu, P. Liu, Q. Huang, S. Xu, Y. Zhao and X. Zhang, *ACS Energy Letters*, 2022, **7**, 2771-2780.
  16. J. Duan, X. Xie, Y. Yang, H. Wan, G. Ma, L. Shen, J. Zhang, L. Tao, H. Wang and H. Zhou, *Organic Electronics*, 2023, **114**, 106750.
  17. M. Hou, Y. Wang, M. Han, H. Ren, R. Wang, J. Zhao, Q. Huang, Y. Ding, X. Zhang, G. Hou and Y. Zhao, *Organic Electronics*, 2022, **106**, 106527.
  18. L. Hao, Z. Li, R. Liu, Z. Shao, L. Wang, X. Wang, G. Cui and S. Pang, *ACS Applied Materials & Interfaces*, 2022, **14**, 12442-12449.
  19. F. Wang, P. Wai-Keung Fong, Z. Ren, H.-L. Xia, K. Zhou, K. Wang, J. Zhu, X. Huang, X.-Y. Liu, H. Wang, Y. Shi, H. Lin, Q. Zhu, G. Li and H. Hu, *Journal of Energy Chemistry*, 2022, **73**, 599-606.
  20. H. Liu, X. Qi, J. Wang, W. Zhang, Y. Xia, Y. Shi, R. Chen and H.-L. Wang, *Solar RRL*, 2022, **6**, 2100960.
